# Supplementary material
Source: Springer Nature journal article supplement (https://www.springermedizin.de/resource/supplementary/12946_2004_86_MOESM10_ESM.pdf/9555508)

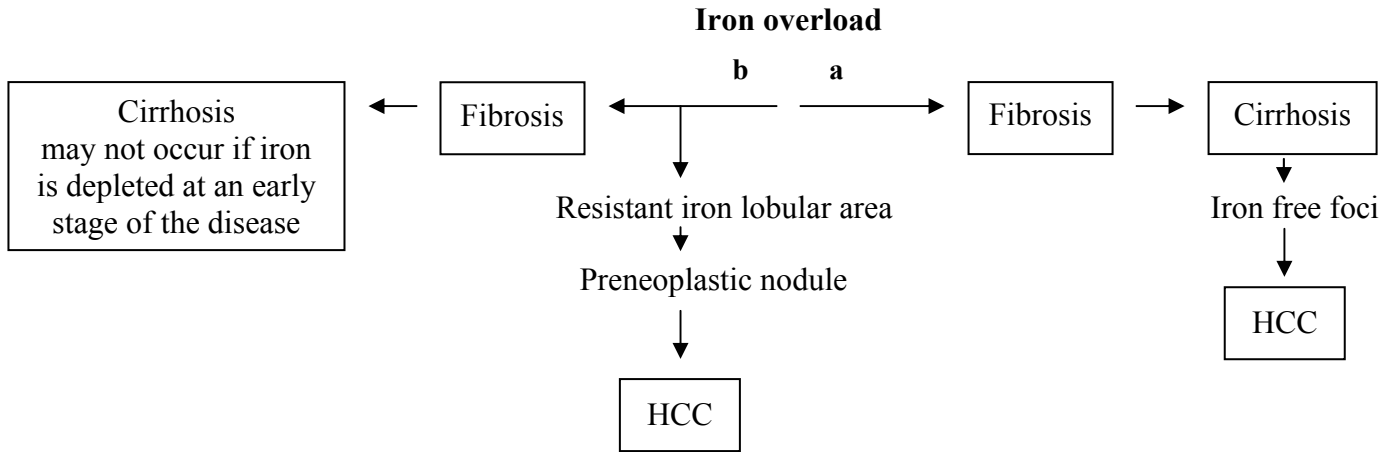

Supplement: MOESM10 [file 9555508]
